# Supplementary material
Source: Springer Nature journal article supplement (https://www.springermedizin.de/resource/supplementary/12913_2008_1049_MOESM3_ESM.pdf/9536216)

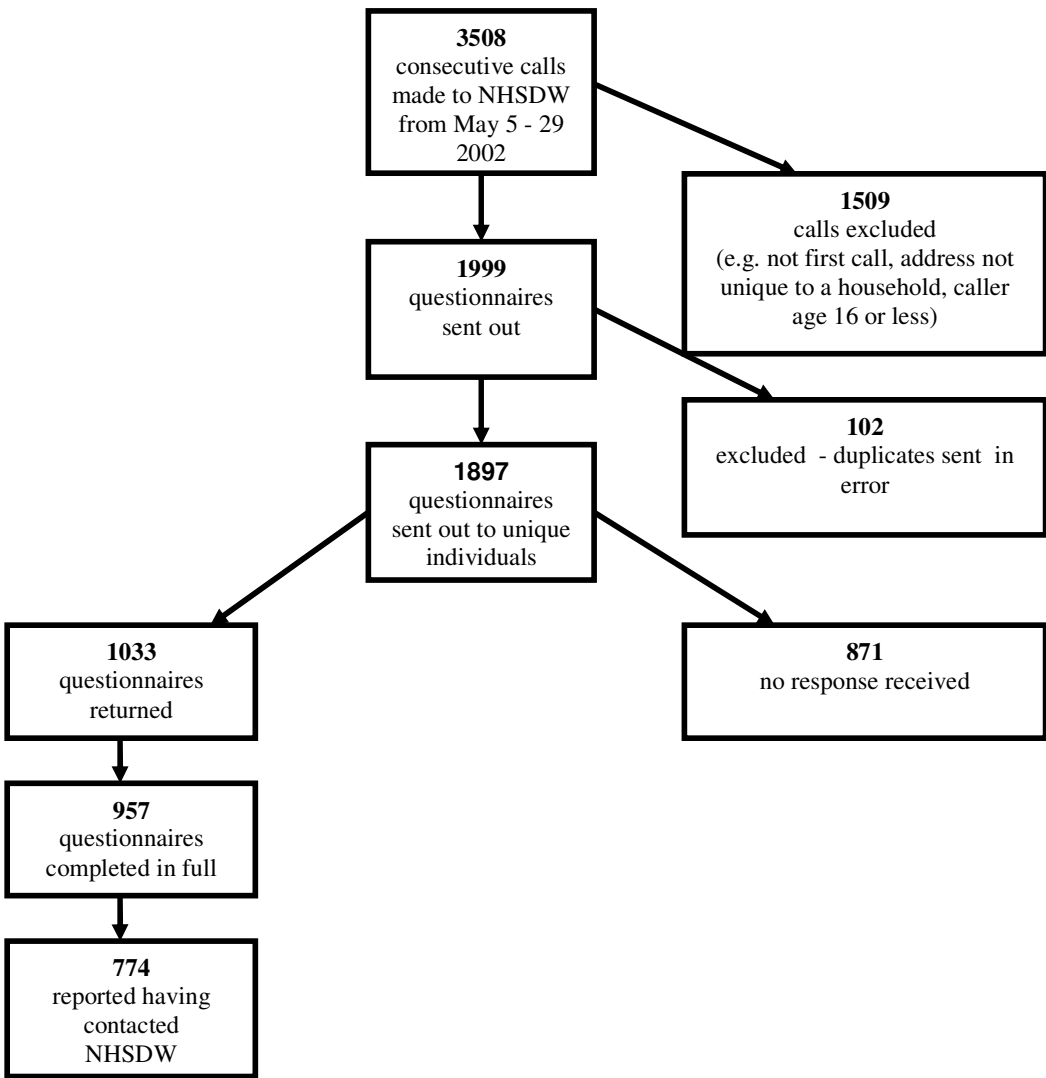

Supplement: MOESM3 [file 9536216]
